# Supplementary material
Source: PubMed Central journal article supplement (PMC5378141)
Supplement: rsif20170001supp1.pdf [file rsif20170001supp1.pdf]

## Supplementary Information: On the growth and form of shoots

Raghunath Chelakkot<sup>†‡</sup>, L. Mahadevan<sup>†\*</sup>

<sup>†</sup>*Paulson School of Engineering and Applied Sciences,  
Harvard University,  
Cambridge, MA 02138, USA.*

<sup>‡</sup>*Department of Physics,  
Indian Institute of Technology Bombay,  
Mumbai 400076, India.*

<sup>\*</sup>*Departments of Organismic and Evolutionary Biology and of Physics,  
Wyss Institute for Biologically Inspired Engineering,  
Kavli Institute for Nano-bio Science and Technology,  
Harvard University,  
Cambridge, MA 02138, USA.*

### I. INFLUENCE OF RELATIVE MATURATION RATE

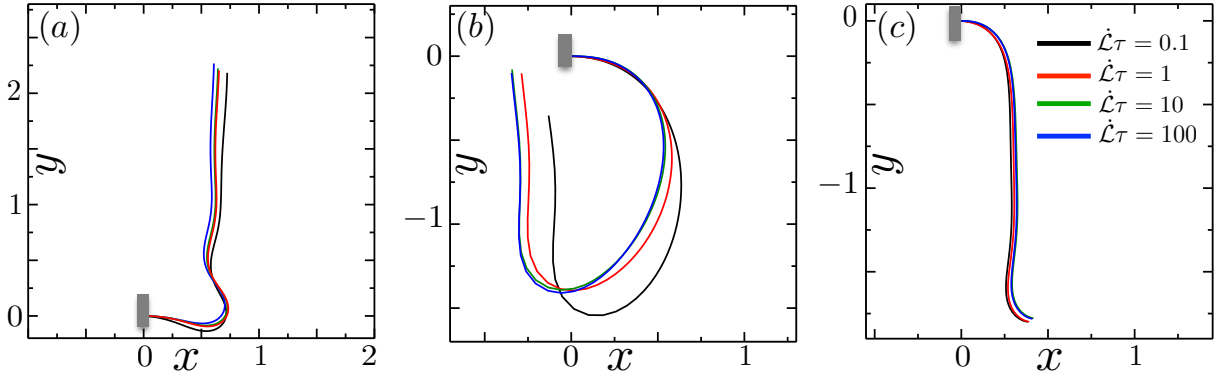

FIG. SI-1: Comparing the shapes of a growing filament for various values of relative maturation rate,  $\dot{\mathcal{L}}\tau$  for sensitivity parameter  $\mathcal{S} = 5$  and for three values elasticity parameter, (a)  $\mathcal{E} = 1.14$ , (b)  $\mathcal{E} = 1.26$  and (c)  $\mathcal{E} = 1.52$ .

Here we examine the influence of the maturation rates on the growth morphologies in plant shoots. The relative maturation rate is controlled by the parameter  $\dot{\mathcal{L}}_0\tau$  which we allow to vary in the range  $[0.1 - 100]$ . In Fig.SI-1 we show the observed shapes for various values of  $\dot{\mathcal{L}}_0\tau$  and the elasticity parameter  $\mathcal{E}$  for the sensitivity  $\mathcal{S} = 5$ , obtained by solving (2.4)-(2.7) of the main text. As  $\mathcal{S}$  is relatively large, the actual shape of the shoots will influence the time dependent growth and the differences due to variations in  $\dot{\mathcal{L}}_0\tau$  are expected to get amplified at long time.

However, there are no significant variations in the qualitative morphologies seen, even though there are quantitative differences.

## II. INFLUENCE OF RELATIVE GROWTH ZONE LENGTH

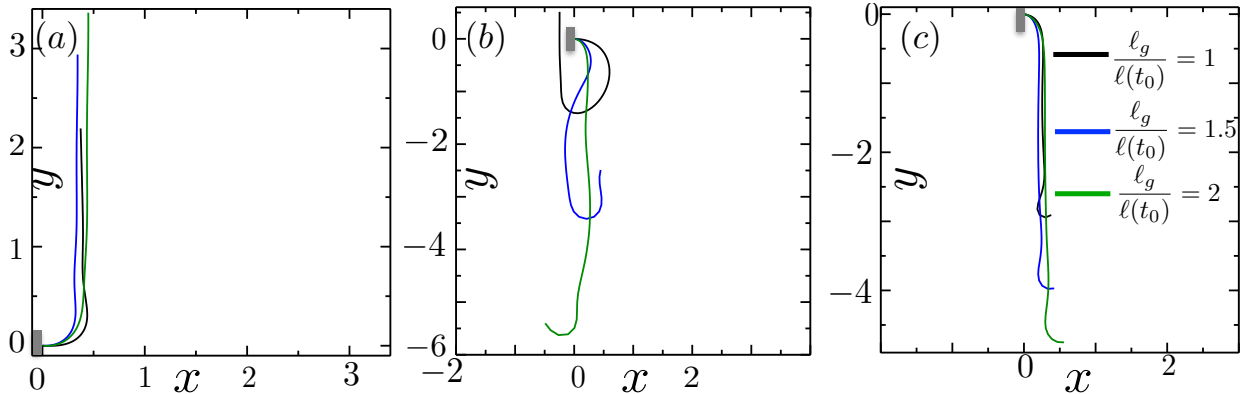

FIG. SI-2: The shapes of a growing filament for different relative length of growth zone  $\ell_g/\ell(t_0)$ . (a) Negative gravitropism for sensitivity parameter  $\mathcal{S} = 5$  and elasticity parameter  $\mathcal{E} = 0.7$ . (b) Model shoot showing gravitropic sign reversal. The parameter regime where this behavior is observed varies depending on  $\ell_g/\ell(t_0)$ . (top to bottom)  $\mathcal{S} = 5$ ,  $\mathcal{S} = 6$ ,  $\mathcal{S} = 7$  and for  $\mathcal{E} = 1.3$ . (c) Positive gravitropism observed for  $\mathcal{E} = 1.52$  and  $\mathcal{S} = 5$ .

To test the dependence of the shapes of growing shoots on the value of the length of growing zone,  $\ell_g$  relative to the initial length of the shoot, we chose various values of  $\ell_g/\ell(t_0)$ . Since the initial condition is always assumed to be a young shoot, we only consider cases with  $\ell_g \geq \ell(t_0)$ . Fig. SI-2 shows the results obtained for values of  $\ell_g/\ell(t_0) = 1, 1.5$  and  $2$ . The simulations show that the shoot basically displays same morphologies for all three values of  $\ell_g$ . When the gravitropic sensitivity  $\mathcal{S}$  dominates, the shoots always display negative gravitropism (Fig. SI-2(a)), whereas when elasticity parameter  $\mathcal{E}$  dominates, they display positive gravitropism (Fig. SI-2(c)). When both these parameters are equally significant, the shoots display gravitropic reversal (Fig SI-2(b)). However, the parameter values where this reversal is observed shift to larger values with an increase in  $\ell_g$ . Therefore, we again conclude that the qualitative features of the morphospace are independent of the value of  $\ell_g$ , although the parameter values for which the shape transition occurs vary for large  $\mathcal{E}$  and  $\mathcal{S}$ .

### III. SIMULATION MOVIES

MOVIE1: Negative gravitropism observed in the massless limit for  $\mathcal{S} = 2.5$ , and  $\mathcal{E}=0$

MOVIE2: Reversal of growth direction for  $\mathcal{S} = 2.5$ , and  $\mathcal{E}=1$

MOVIE3: Reversal of growth direction for  $\mathcal{S} = 3$ , and  $\mathcal{E}=1.2$

MOVIE4: Effectively positive gravitropism observed for  $\mathcal{S} = 3$ , and  $\mathcal{E} = 1.5$ .

The movies show the growing shoot for different values of the sensitivity parameter  $\mathcal{S}$ , and the elasticity parameter  $\mathcal{E}$ . The green color corresponds to the young, soft shoot while the brown color corresponds to the older stiffer shoot.
